# Supplementary material for: The Nature of Abstract Orthographic Codes: Evidence from Masked Priming and Magnetoencephalography
Source: PubMed Central journal article supplement (PMC2876033; doi:10.1371/journal.pone.0010793), 2010-05-25
Supplement: pone.0010793.s001.pdf [file pone.0010793.s001.pdf]

Appendix 1. Stimuli of Experiments 1a and 1b.

| Target | Pronunciation | Translation    | Script | Semantic | Pronunciation | Translation  | Unrelated | Pronunciation | Translation       |
|--------|---------------|----------------|--------|----------|---------------|--------------|-----------|---------------|-------------------|
| カシス    | kashisu       | currant        | かしす    | ザクロ      | zakuro        | pomegranate  | メイク       | meiku         | make up           |
| カナッペ   | kanappe       | canapé         | かなっぺ   | オードブル    | oodoburu      | hors devours | タクシー      | takushii      | taxi              |
| ブルマ    | buruma        | shorts         | ぶるま    | パンツ      | pantu         | pants        | コンビニ      | konbini       | convenience store |
| モヘア    | mohea         | fir            | もへあ    | カシミア     | kashimia      | cashmere     | トイレ       | toire         | toilet            |
| スポイト   | supoito       | dropper        | すぼいと   | ビーカー     | biikaa        | beaker       | バス        | basu          | bus               |
| マロン    | maron         | chestnut       | まろん    | ヤシ       | yashi         | palm         | エアコン      | eakon         | air conditioner   |
| スパナ    | supana        | screw wrench   | すばな    | レンチ      | renchi        | wrench       | ベッド       | beddo         | bed               |
| ラムネ    | ramune        | lemon soda     | なむね    | ソーダ      | sooda         | soda         | ビデオ       | bideo         | video             |
| ズック    | zukku         | rubber shoes   | ずっく    | シューズ     | shuuzu        | shoes        | ラジカセ      | rajikase      | radio             |
| カルキ    | karuki        | chlorine       | かるき    | ホルマリン    | horumarin     | formaldehyde | ネクタイ      | nekutai       | neck tie          |
| ペンチ    | penchi        | pliers         | ぺんち    | ドリル      | doriru        | drill        | ベルト       | beruto        | belt              |
| クローラー  | kurooru       | stroke         | くろーる   | バタフライ    | batafurai     | butterfly    | ジャージ      | jyaaji        | workout pants     |
| バリカン   | barikan       | hair clipper   | ばりかん   | ドライヤー    | doraiaa       | dryer        | ブラウス      | burausu       | blouse            |
| チョッキ   | chokki        | vest           | ちょっき   | ジャケット    | iyaketto      | jacket       | カメラ       | kamera        | camera            |
| グラタン   | guratan       | gratin         | ぐらたん   | ドリア      | doria         | doria        | タバコ       | tabako        | tobacco           |
| ビンタ    | binta         | slap           | びんた    | パンチ      | panchi        | punch        | シャンプー     | shanpuu       | shampoo           |
| ラッコ    | rakko         | sea otter      | らっこ    | あざらし     | azarashi      | sea lion     | スプーン      | supuun        | spoon             |
| カステラ   | kasutera      | pound cake     | かすてら   | タルト      | taruto        | tart         | ストロー      | sutoroo       | straw             |
| ピエロ    | piero         | clown          | びえろ    | タレント     | tarento       | performer    | フォーク      | fooku         | fork              |
| トナカイ   | tonakai       | reindeer       | となかひ   | カモシカ     | kamoshika     | antelope     | ビール       | biiru         | beer              |
| ゼッケン   | zekken        | singlet        | ぜっけん   | レッテル     | retteru       | label        | サザエ       | sazae         | turban shell      |
| テロップ   | teroppu       | subtitle       | てろっぷ   | タイトル     | taitoru       | title        | キンピラ      | kinpira       | fry               |
| ブランコ   | buranko       | swing          | ぶらんこ   | シーソー     | shiishoo      | see saw      | ステーキ      | suteeki       | steak             |
| メルヘン   | meruhen       | fairy tale     | めるへん   | ロマン      | roman         | romantic     | シチュー      | shichuu       | stew              |
| ブリキ    | buriki        | tin            | ぶりき    | ブロンズ     | buronzu       | bronze       | ピザ        | piza          | pizza             |
| コンロ    | konro         | stove          | こんろ    | オープン     | oobun         | oven         | コイン       | koin          | coin              |
| カイワレ   | kaiware       | radish sprouts | かいわれ   | アブラナ     | aburana       | oilseed rape | プレゼント     | purezento     | present           |
| スコップ   | sukoppu       | hand shovel    | すこっぷ   | ショベル     | shoveru       | shovel       | キャベツ      | kyabetsu      | cabbage           |
| ゴキブリ   | gokiburi      | cockroach      | ごきぶり   | セミ       | semi          | cicada       | ニュース      | nyuusu        | news              |
| ボンベ    | bonbe         | cylinder       | ぼんべ    | タンク      | tanku         | tank         | テアトル      | teatoru       | theater           |
| ミイラ    | miira         | mummy          | みいら    | ドクロ      | dokuro        | scull        | セレブ       | serebu        | celebrity         |
| デマ     | dema          | rumor          | でま     | ゴシップ     | goshippu      | gossip       | ピクニック     | pikunikku     | picnic            |
| アジト    | ajito         | hideout        | あじと    | ベース      | beesu         | base         | クレープ      | kureepu       | crepe             |
| デッサン   | dessan        | sketch         | でっさん   | イラスト     | irasuto       | illustration | ペット       | petto         | pet               |
| ゲレンデ   | gerende       | slope          | げれんで   | アリーナ     | ariina        | arena        | シェフ       | shefu         | chief             |
| オオカミ   | ookami        | Japanese wolf  | おおかみ   | ウルフ      | urufu         | wolf         | ハンコ       | hanko         | stamp             |
| ピーマン   | piiman        | green pepper   | ぴーまん   | トマト      | tomato        | tomato       | エンジン      | enjin         | engine            |
| ミシン    | mishin        | sewing machine | みしん    | アイロン     | airon         | iron         | カヤック      | kayakku       | kayak             |
| アトリエ   | atorie        | atelier        | あとリエ   | スタジオ     | sutajio       | studio       | バトン       | baton         | baton             |
| カルテ    | karute        | medical chart  | かるて    | ファイル     | fairu         | file         | トリビア      | toribia       | trivia            |
| バッジ    | bajji         | button         | ばっじ    | ブローチ     | buroochi      | brooch       | アリバイ      | aribai        | alibi             |
| ズボン    | zubon         | pants          | ずぼん    | キュロット    | kyurotto      | curettes     | ガム        | gamu          | gum               |
| パン     | pan           | bread          | ぱん     | ライス      | raisu         | rice         | ジャンル      | jyanru        | genre             |
| パチンコ   | pachinko      | slot machine   | ぱちんこ   | バクチ      | bakuchi       | gamble       | トンネル      | tonnneru      | tunnel            |
| ガット    | gatto         | gut (tennis)   | がっと    | ストリング    | surorinngu    | string       | ハンドル      | handoru       | handle            |
