# Supplementary material for: The Nature of Abstract Orthographic Codes: Evidence from Masked Priming and Magnetoencephalography
Source: PubMed Central journal article supplement (PMC2876033; doi:10.1371/journal.pone.0010793), 2010-05-25
Supplement: pone.0010793.s002.pdf [file pone.0010793.s002.pdf]

## Appendix 2. Stimuli of Experiment 2.

| Katakana<br>(Typical) | Hiragana<br>(Atypical) | Pronunciation | Translation    |
|-----------------------|------------------------|---------------|----------------|
| トランプ                  | とらんぷ                   | toranpu       | playing cards  |
| ミイラ                   | みいら                    | miira         | mummy          |
| ゴンドラ                  | ごんどら                   | dondora       | gondola        |
| デマ                    | でま                     | dema          | rumor          |
| アジト                   | あじと                    | ajito         | hideout        |
| デッサン                  | でっさん                   | dessan        | sketch         |
| ゲレンデ                  | げれんで                   | gerende       | slope          |
| ランドセル                 | らんどせる                  | randoseru     | school bag     |
| オオカミ                  | おおかみ                   | ookami        | Japanese wolf  |
| ピーマン                  | ぴーまん                   | piiman        | green pepper   |
| レッテル                  | れってる                   | retteru       | label          |
| ミシン                   | みしん                    | mishin        | sewing machine |
| アトリエ                  | あとリエ                   | atorie        | atelier        |
| プレハブ                  | ぶれはぶ                   | purehabu      | house          |
| コンセント                 | こんせんと                  | konsento      | plug           |
| カルテ                   | かるて                    | karute        | medical chart  |
| バッジ                   | ばっじ                    | bajji         | button         |
| シール                   | しーる                    | shiiru        | sticker        |
| ナトリウム                 | なとりうむ                  | natoriumu     | sodium         |
| アイヌ                   | あいぬ                    | ainu          | Ainu           |
| ズボン                   | ずぼん                    | zubon         | pants          |
| ワクチン                  | わくちん                   | wakuchin      | vaccine        |
| ウラン                   | うらん                    | uran          | uranium        |
| オウム                   | おうむ                    | oumu          | owl            |
| パン                    | ぱん                     | pan           | bread          |
| コンクール                 | こんくーる                  | konkuuru      | contest        |
| パチンコ                  | ぱちんこ                   | pachinko      | slot machine   |
| アルバイト                 | あるばいと                  | arubaito      | side job       |
| ガット                   | がっと                    | gatto         | gut (tennis)   |
| アンケート                 | あんけーと                  | ankeeto       | survey         |

| Katakana<br>(Typical) | Hiragana<br>(Atypical) | Pronunciation | Translation     |
|-----------------------|------------------------|---------------|-----------------|
| シミーズ                  | しみーず                   | shimiizu      | under slips     |
| プロマイド                 | ぷろまいど                  | puromaido     | profile picture |
| カシス                   | かしす                    | kashisu       | currant         |
| カナッペ                  | かなっぺ                   | kanappe       | canapé          |
| ホッチキス                 | ほっちきす                  | hochikisu     | staple          |
| ビューラー                 | びゅーらー                  | byuuraa       | curler          |
| マドロス                  | まどろす                   | madorosu      | sailor          |
| ブルマ                   | ぶるま                    | buruma        | shorts          |
| モヘア                   | もへあ                    | mohea         | fir             |
| スポイト                  | すぽいと                   | supoito       | dropper         |
| マロン                   | まろん                    | maron         | chestnut        |
| ポンカン                  | ぽんかん                   | ponkan        | orange          |
| ムニエル                  | むにえる                   | munieru       | meuniere        |
| ペチカ                   | ぺちか                    | pechika       | stove           |
| スパナ                   | すばな                    | supana        | screw wrench    |
| ラムネ                   | なむね                    | ramune        | lemon soda      |
| バギー                   | ばぎー                    | bagii         | stroller        |
| ズック                   | ずっく                    | zukku         | rubber shoes    |
| カルビ                   | かるび                    | karubi        | rib             |
| カルキ                   | かるき                    | karuki        | chlorine        |
| ペンチ                   | ぺんち                    | penchi        | pliers          |
| ヤニ                    | やに                     | yani          | tar             |
| クロール                  | くろーる                   | kurooru       | stroke          |
| バリカン                  | ばりかん                   | barikan       | hair clipper    |
| チャック                  | ちゃっく                   | chakku        | zipper          |
| チョッキ                  | ちょっき                   | chokki        | vest            |
| シューマイ                 | しゅーまい                  | shuumai       | dumpling        |
| オブラート                 | おぶらーと                  | oburaato      | candy coat      |
| ポシェット                 | ぼしえっと                  | boshetto      | bag             |
| グラタン                  | ぐらたん                   | guratan       | gratin          |
